# Supplementary material
Source: PubMed Central journal article supplement (PMC9247888)
Supplement: mmc1.pdf [file mmc1.pdf]

**The American Journal of Human Genetics, Volume 109**

**Supplemental information**

**The immunogenetics of viral antigen response  
is associated with subtype-  
specific glioma risk and survival**

**Geno Guerra, Linda Kachuri, George Wendt, Helen M. Hansen, Steven J. Mack, Annette M. Molinaro, Terri Rice, Paige Bracci, John K. Wiencke, Nori Kasahara, Jeanette E. Eckel-Passow, Robert B. Jenkins, Margaret Wrensch, and Stephen S. Francis**

**Figure S1: Correlation of chromosome 6 antigen associated SNPs**

A) Seroreactivity-increasing allele correlation grouped by associated antigen

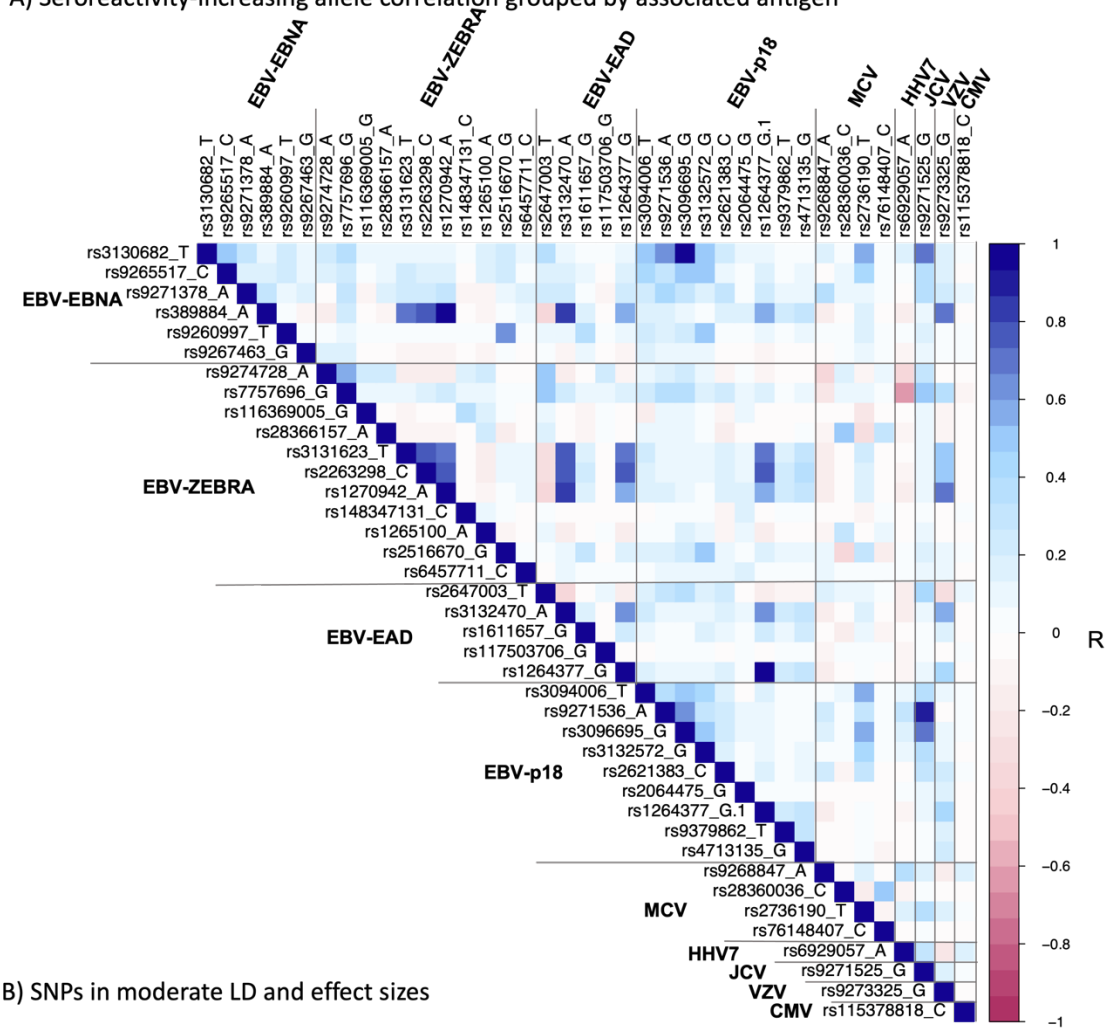

B) SNPs in moderate LD and effect sizes

| Exposure 1 | SNP       | Effect | Correlated Allele | R <sup>2</sup> | Correlated Allele | Effect | SNP       | Exposure 2 |
|------------|-----------|--------|-------------------|----------------|-------------------|--------|-----------|------------|
| EBV-EBNA   | rs3130682 | 0.022  | T                 | 0.8769         | G                 | 0.207  | rs3096695 | EBV-p18    |
| EBV-EBNA   | rs389884  | 0.157  | A                 | 0.671          | A                 | 0.159  | rs3132470 | EBV-EAD    |
| EBV-EBNA   | rs389884  | 0.157  | A                 | 0.985          | A                 | 0.154  | rs1270942 | EBV-ZEBRA  |
| EBV-ZEBRA  | rs3131623 | 0.167  | T                 | 0.609          | A                 | 0.159  | rs3132470 | EBV-EAD    |
| EBV-ZEBRA  | rs2263298 | 0.154  | C                 | 0.556          | G                 | 0.119  | rs1264377 | EBV-EAD    |
| EBV-ZEBRA  | rs1270942 | 0.154  | A                 | 0.659          | A                 | 0.159  | rs3132470 | EBV-EAD    |
| EBV-ZEBRA  | rs2263298 | 0.154  | C                 | 0.556          | G                 | 0.118  | rs1264377 | EBV-p18    |
| EBV-p18    | rs9271536 | 0.200  | A                 | 0.611          | G                 | -0.318 | rs9271525 | JCV        |

A) Heatmap of correlation values (R) of all LD-pruned seroreactivity-increasing alleles on chromosome 6 considered in our analysis, separated by the corresponding significantly associated antigen. Correlations were calculated using samples of European genetic descent from the UCSF-Mayo case and control dataset and the allele specified by each rsid suffix. B) Further detail into all pairs of SNPs in moderate LD ( $R^2 > 0.5$  within 500kb) on chromosome 6, as estimated from European populations using LDlink, including the correlated allele pair and their effects on the associated exposure antigens, as previously calculated in Kachuri and Francis et al, 2020. Note that rs1264377\_G is a shared effect increasing allele for both EBV -p18 and -EAD.

Figure S2: Correlation matrix of chr 6 GRS SNPs and two-field HLA alleles

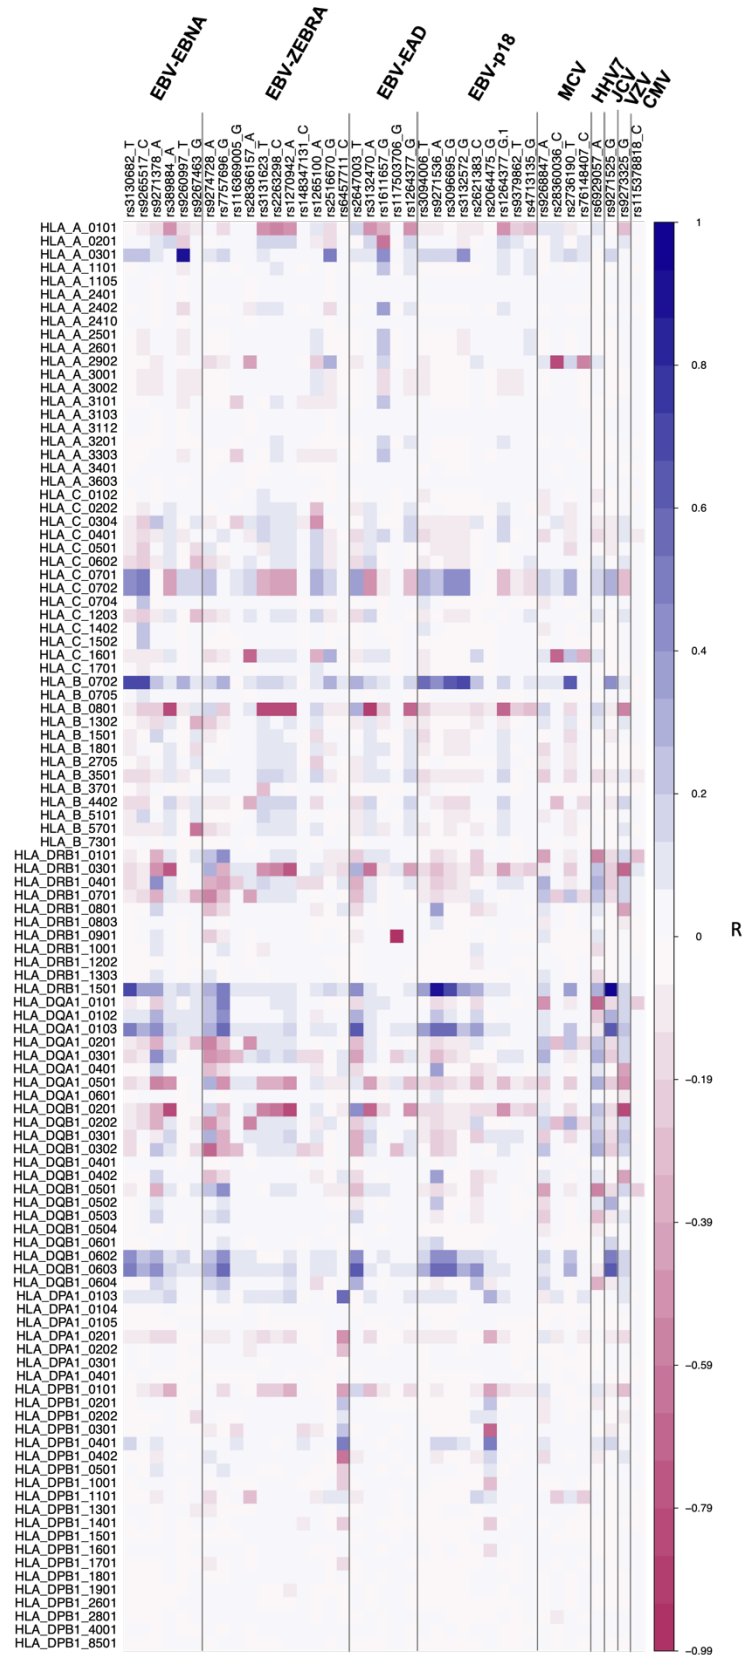

Heatmap of correlation values ( $R$ ) of all LD-pruned seroreactivity-increasing alleles on chromosome 6 considered in our GRS analysis with the presence of each HLA allele. SNP alleles are partitioned by the corresponding significantly associated antigen, with imputed HLA alleles (at two-field resolution).  $R$  was calculated using European cases and controls from the UCSF-Mayo dataset. Cells with darker shades indicate higher levels of correlation.

Figure S3: All GRS-Glioma risk meta-result forest plots, by antigen

S3 A) Glioma overall

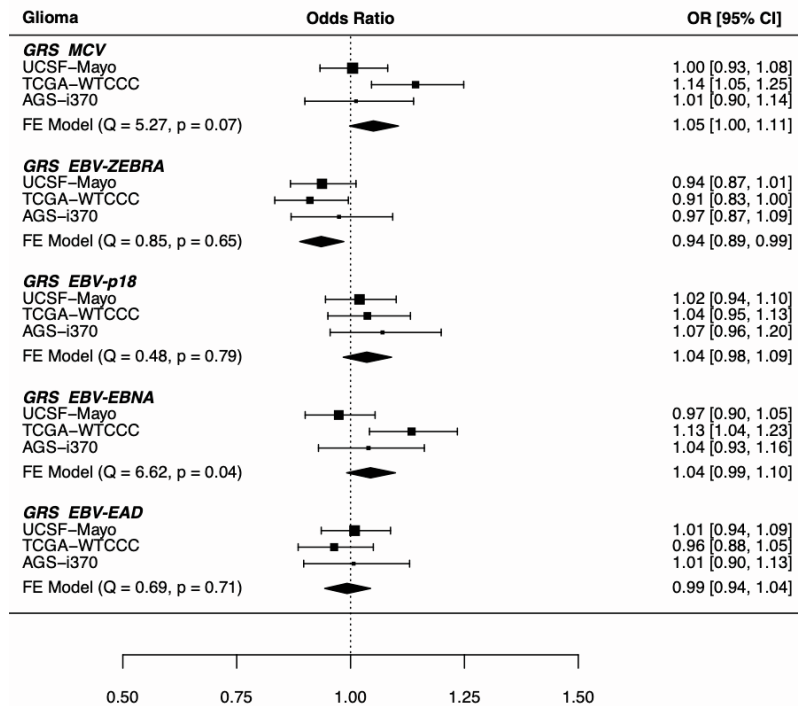

S3 B) IDH mutated

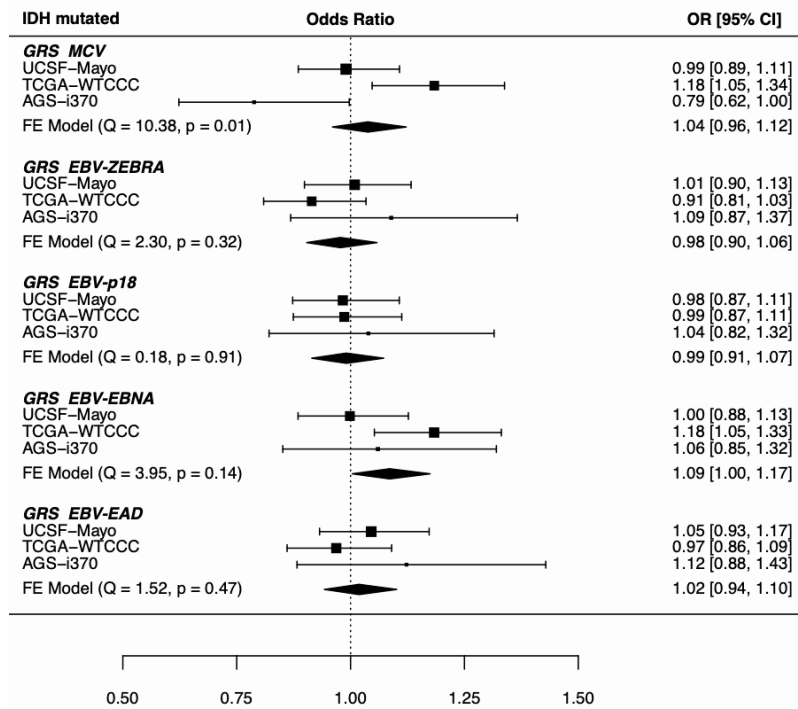

### S3 C) IDH mutated 1p/19q codeleted

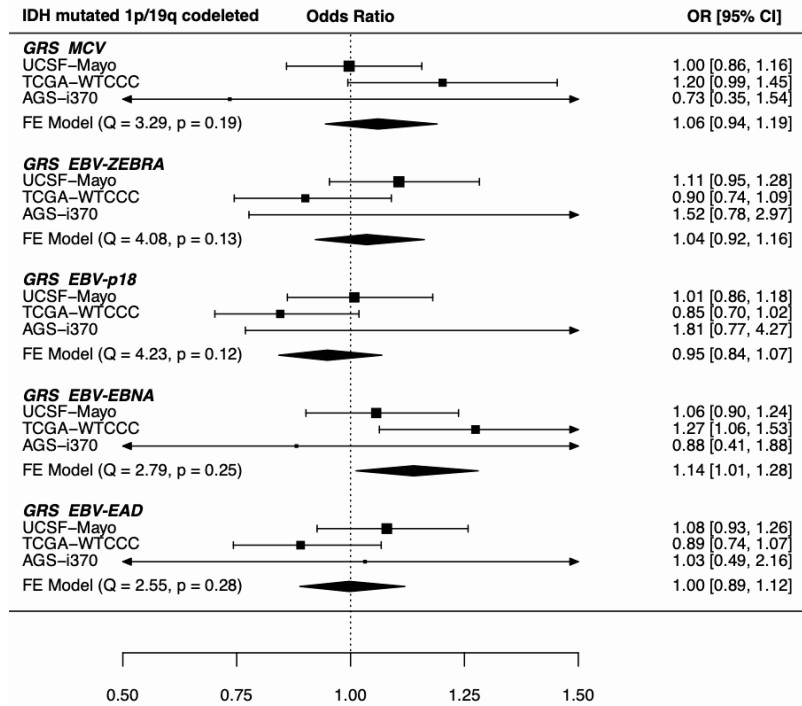

### S3 D) IDH mutated 1p/19q non-codeleted

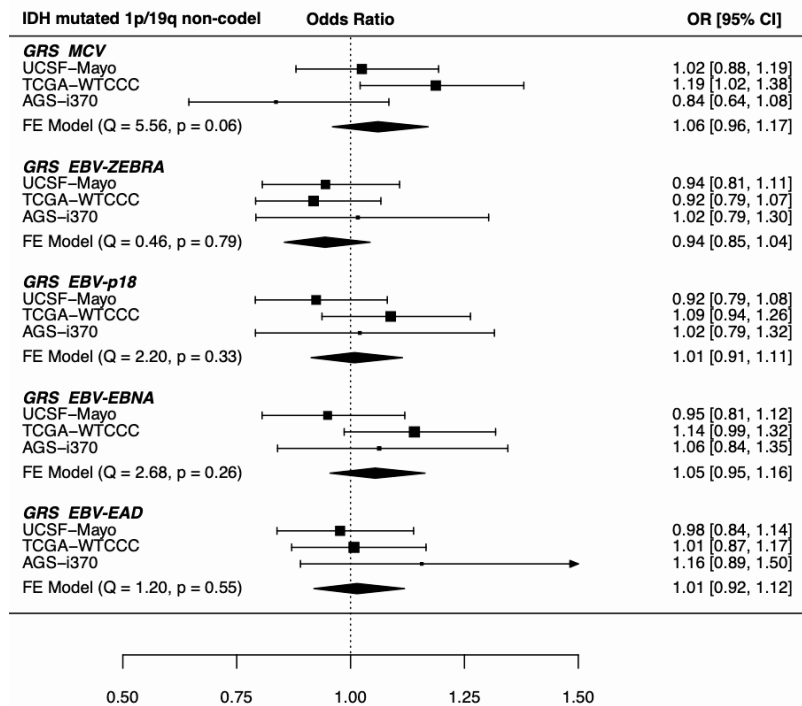

### S3 E) IDH wild type

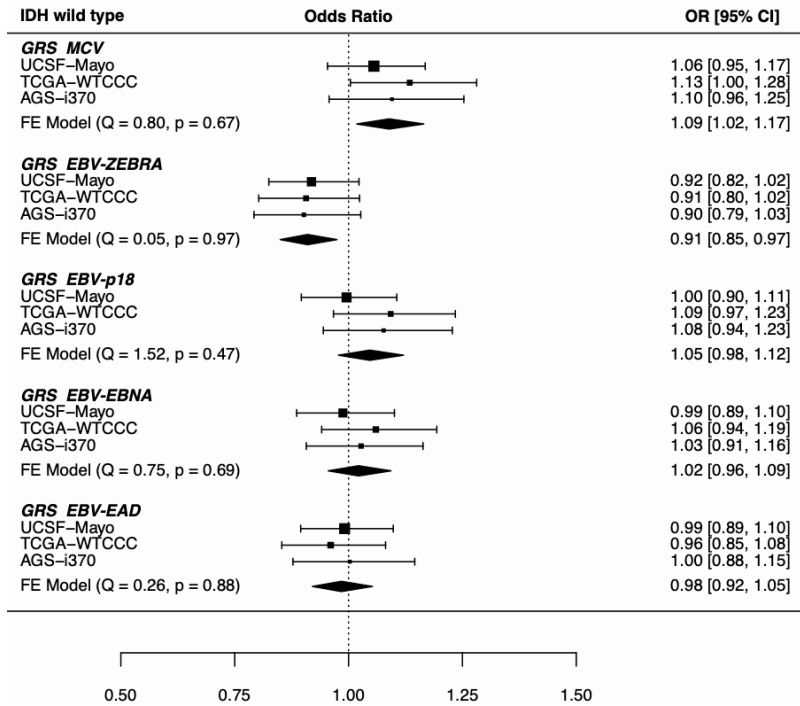

### S3 F) IDH wild type 1p/19q non-codeleted

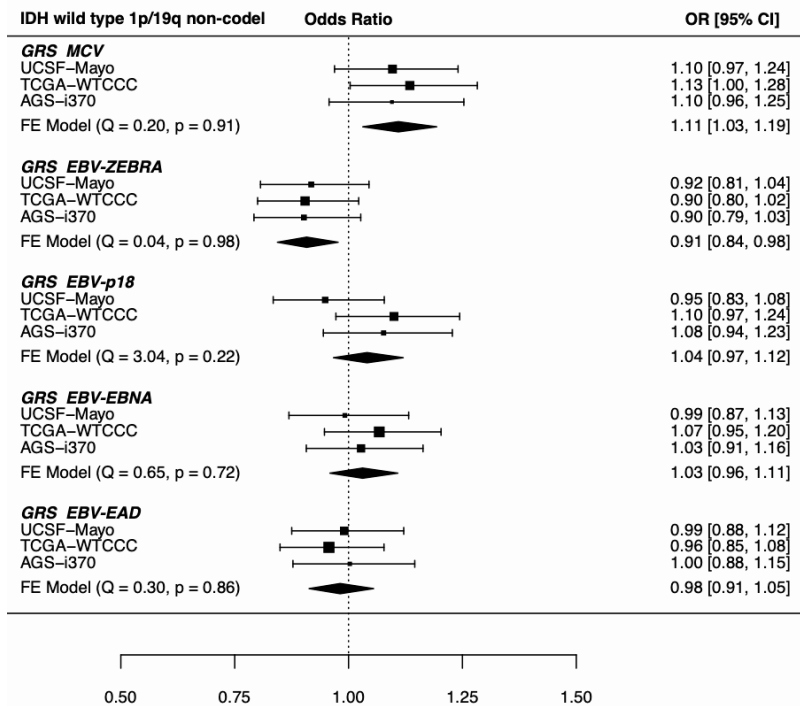

A-F) Forest plot meta-analysis results of all tested GRS-glioma risk associations for the specific primary subtype. Results are reported as odds ratios, along with 95% confidence intervals. Briefly, each header indicates the studied glioma molecular subtype, within are each GRSs associations with the subtype, and the 95% confidence interval of each study-specific effect. The diamond visualizes the 95% confidence interval for the fixed effect (FE) meta-analysis across studies. Each meta-analysis was tested for between-study heterogeneity (Q statistic), with  $p < 0.05$  indicating evidence of study-specific associations. GRS-subtype tests with evidence of significant heterogeneity were re-analyzed using a random-effects meta-analysis (results not reported). No new suggestive associations were found after re-analysis.



**Figure S4: All GRS-Glioma survival meta result forest plots, by antigen**

**S4 A) Glioma overall**

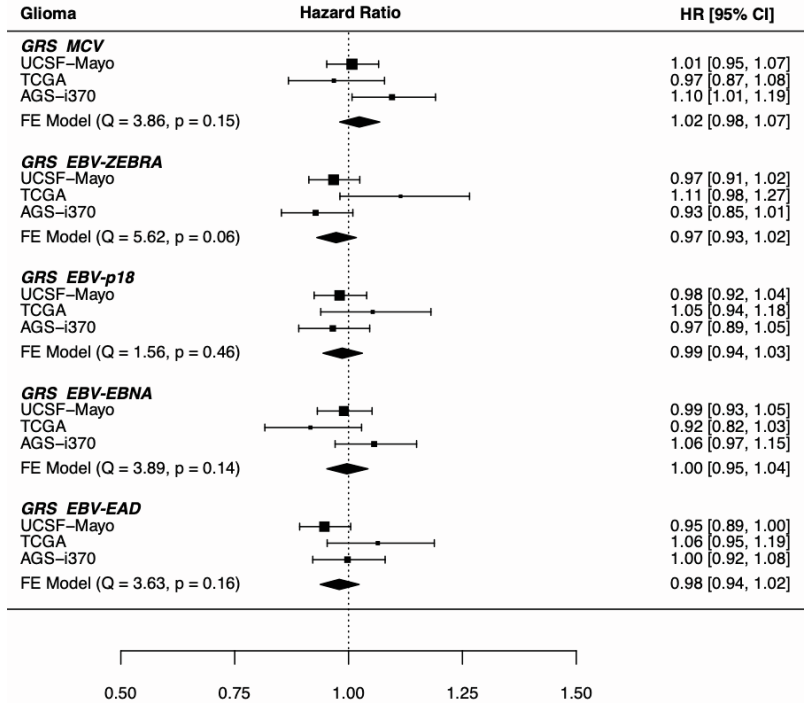

**S4 B) IDH mutated**

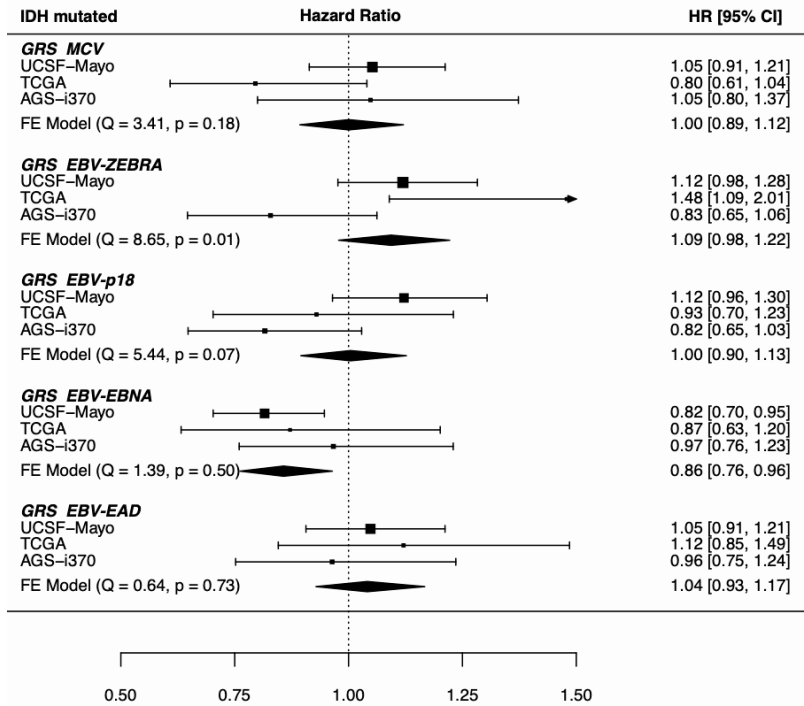

### S4 C) IDH mutated 1p/19q codeleted

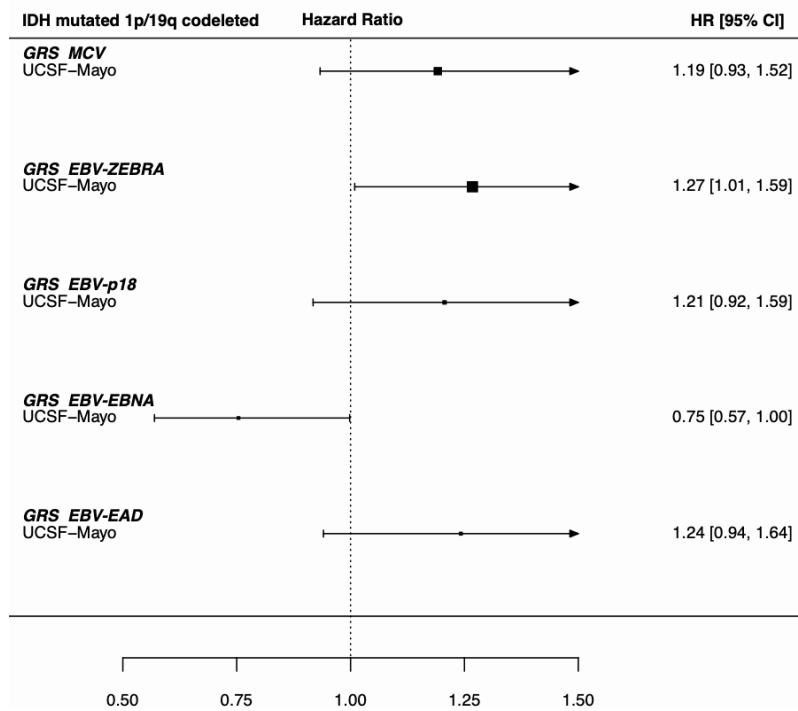

### S4 D) IDH mutated 1p19 non-codeleted

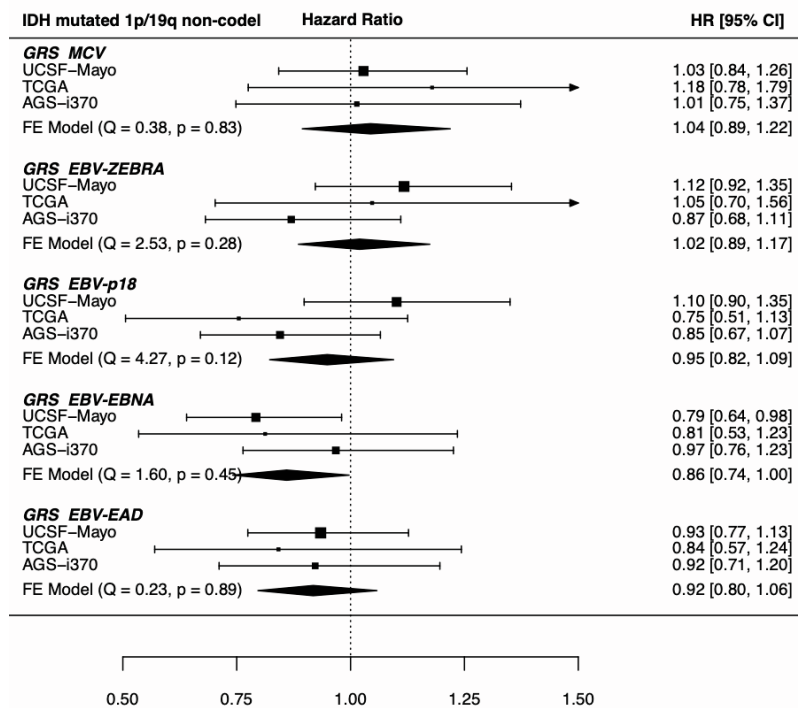

### S4 E) IDH wild type

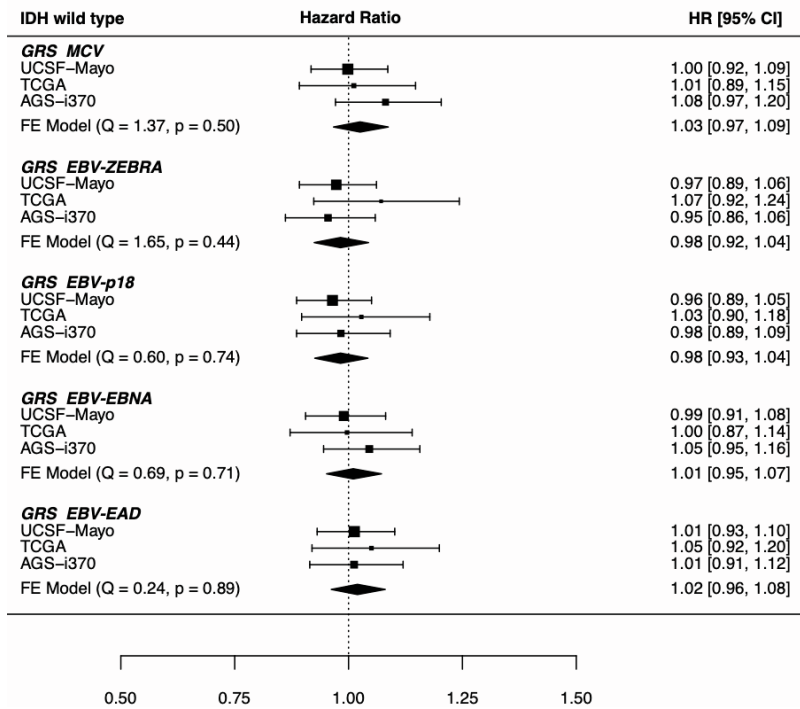

### S4 F) IDH wild type 1p/19q non-codeleted

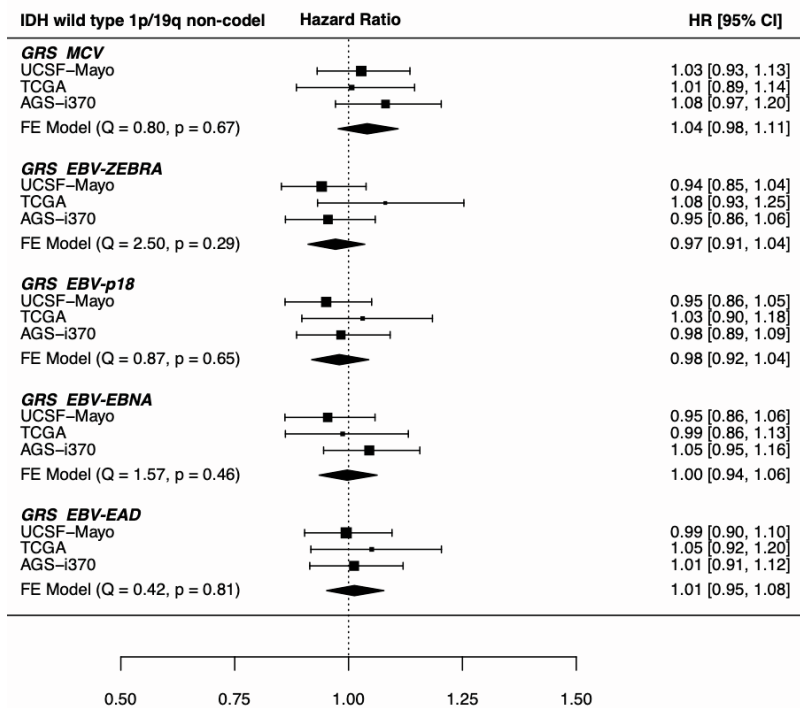

A-F) Forest plot meta-analysis results of all tested GRS-glioma survival associations. Results are reported as hazard ratios, along with 95% confidence intervals. Briefly, each header indicates the studied glioma molecular subtype, within are each GRSs associations with the clinical outcomes of that subtype, and the 95% confidence interval of each study-specific effect. The diamond visualizes the 95% confidence interval for the fixed effect (FE) meta-analysis across included studies. Studies which had an insufficient number of cases/events in a subtype were not included in the meta-analysis and no meta-analysis was performed if only one study was included. Each meta-analysis was tested for between-study heterogeneity (Q statistic), with  $p < 0.05$  indicating evidence of study-specific associations. GRS-subtype tests with evidence of significant heterogeneity were re-analyzed using a random-effects meta-analysis (results not reported). No new suggestive associations were found after re-analysis.

**Figure S5: Glioma survival Kaplan-Meier curves by antigen GRS and subtype**

**S5 A) Glioma overall**

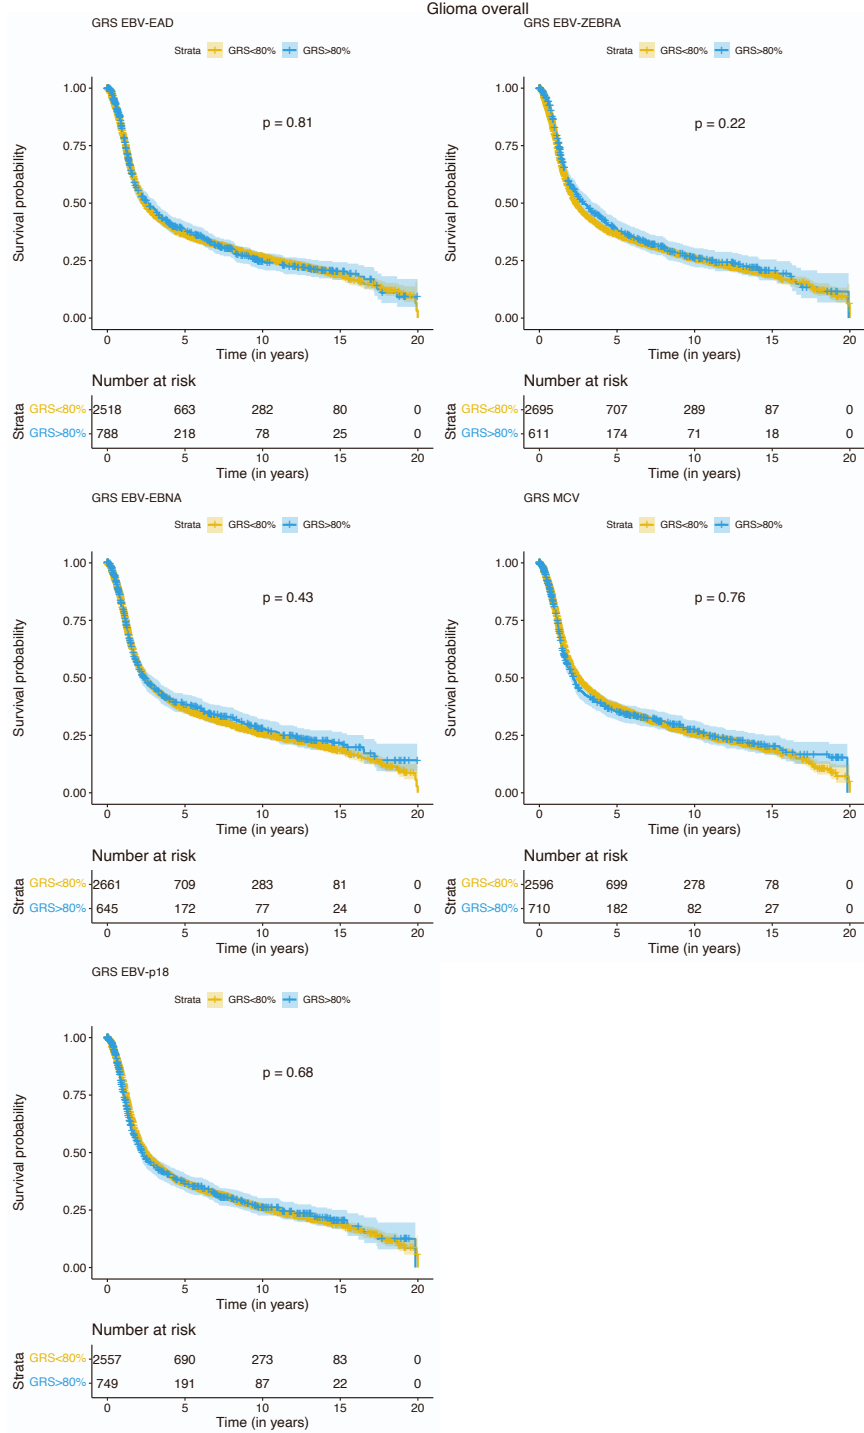

## S5 B) IDH mutated

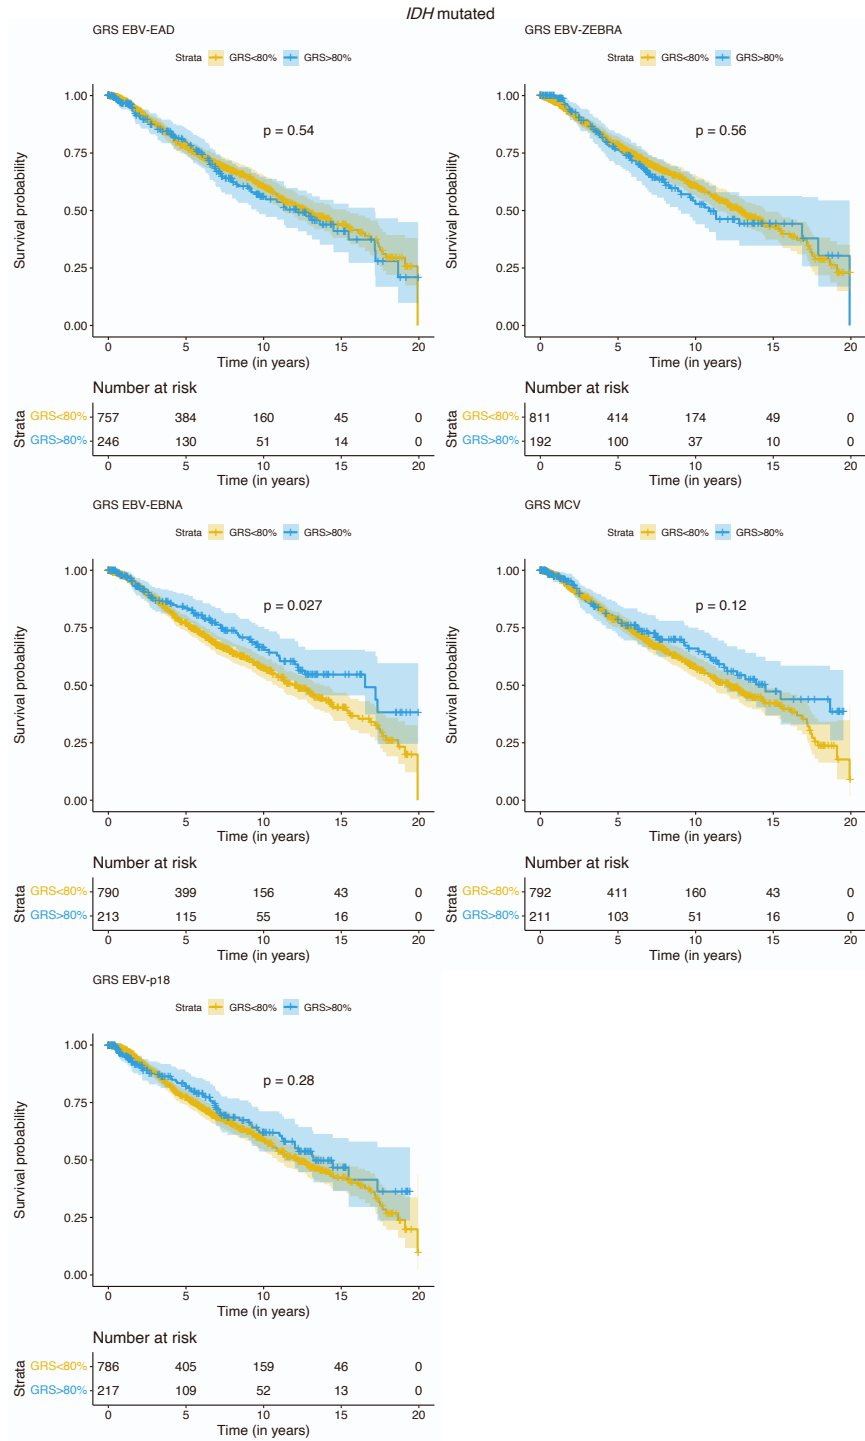

# S5 C) IDH mutated 1p/19q codeleted

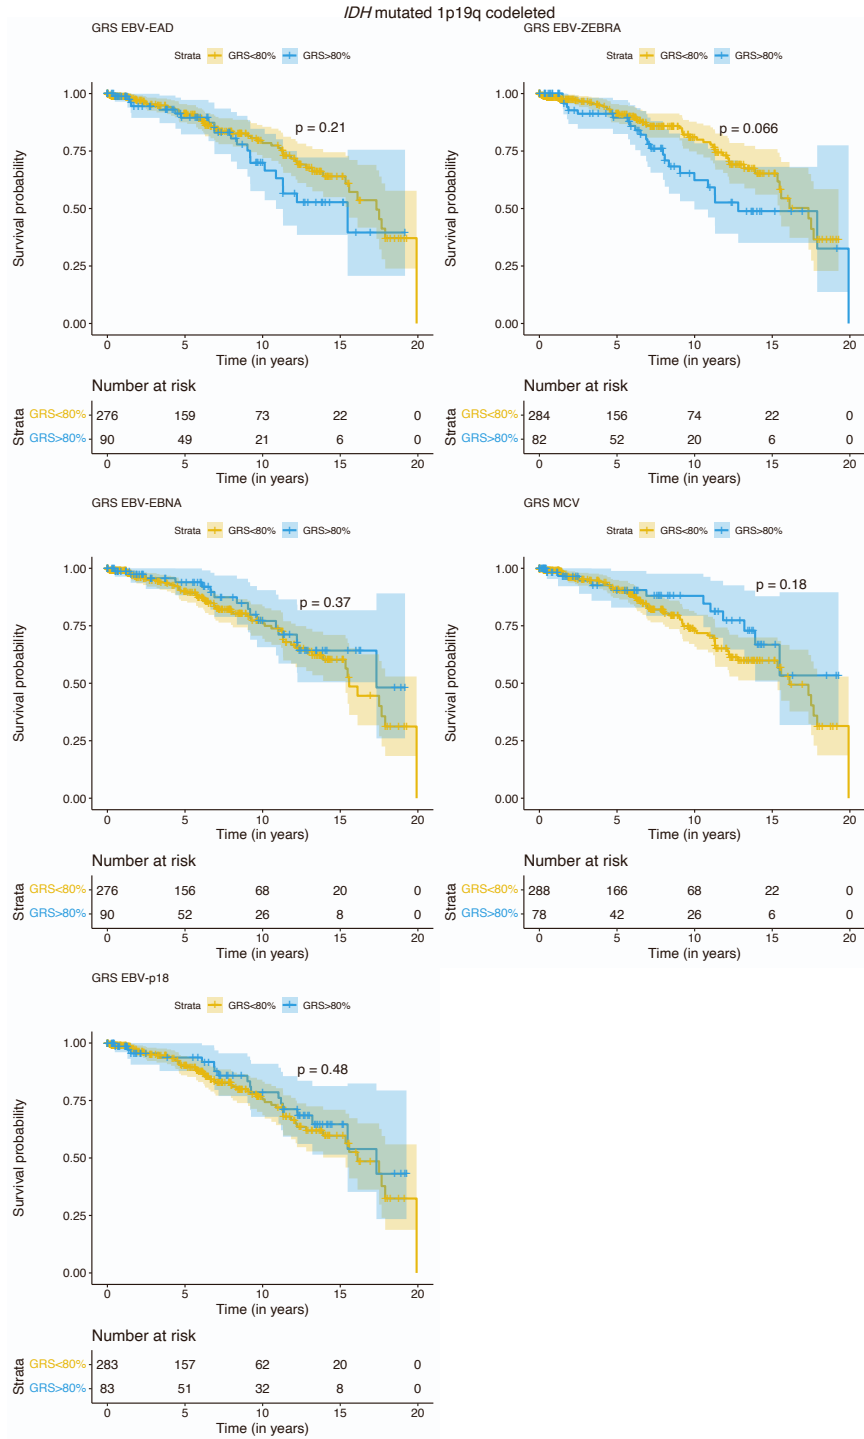

## S5 D) IDH mutated 1p19q non-codeleted

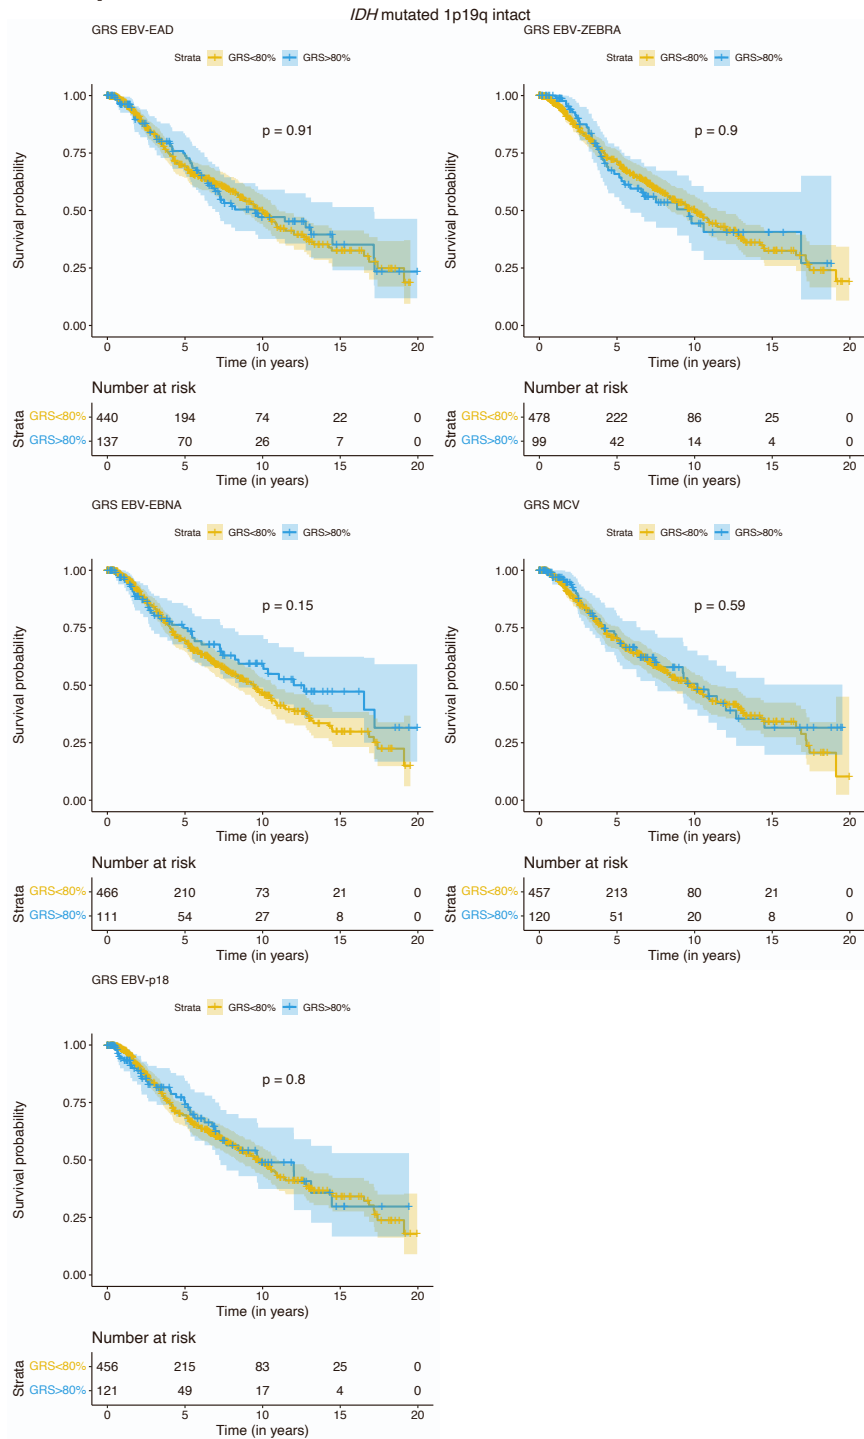



## S5 E) IDH wild type

IDH wild-type

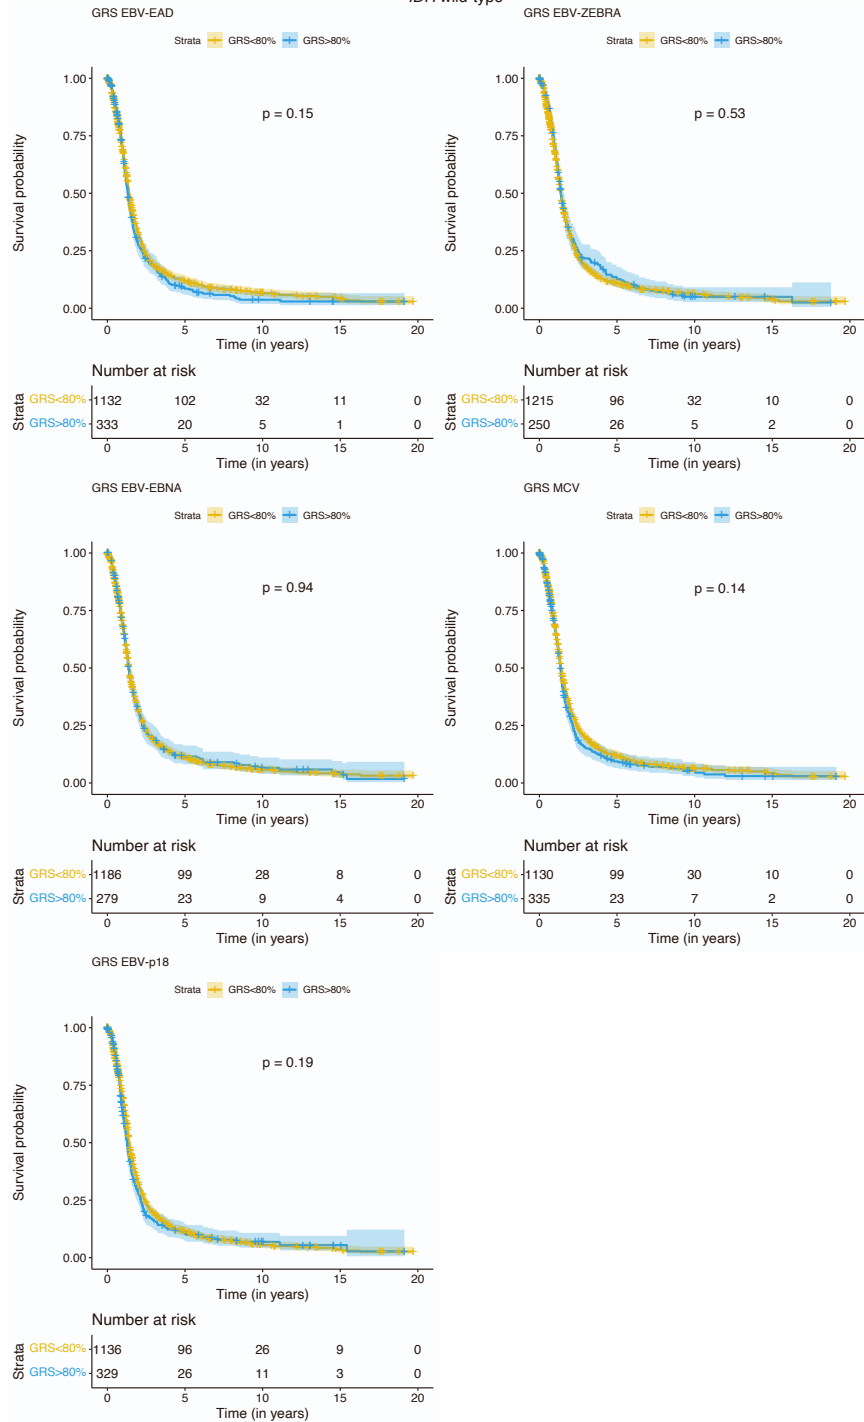

# S5 F) IDH wild type 1p/19q non-codeleted

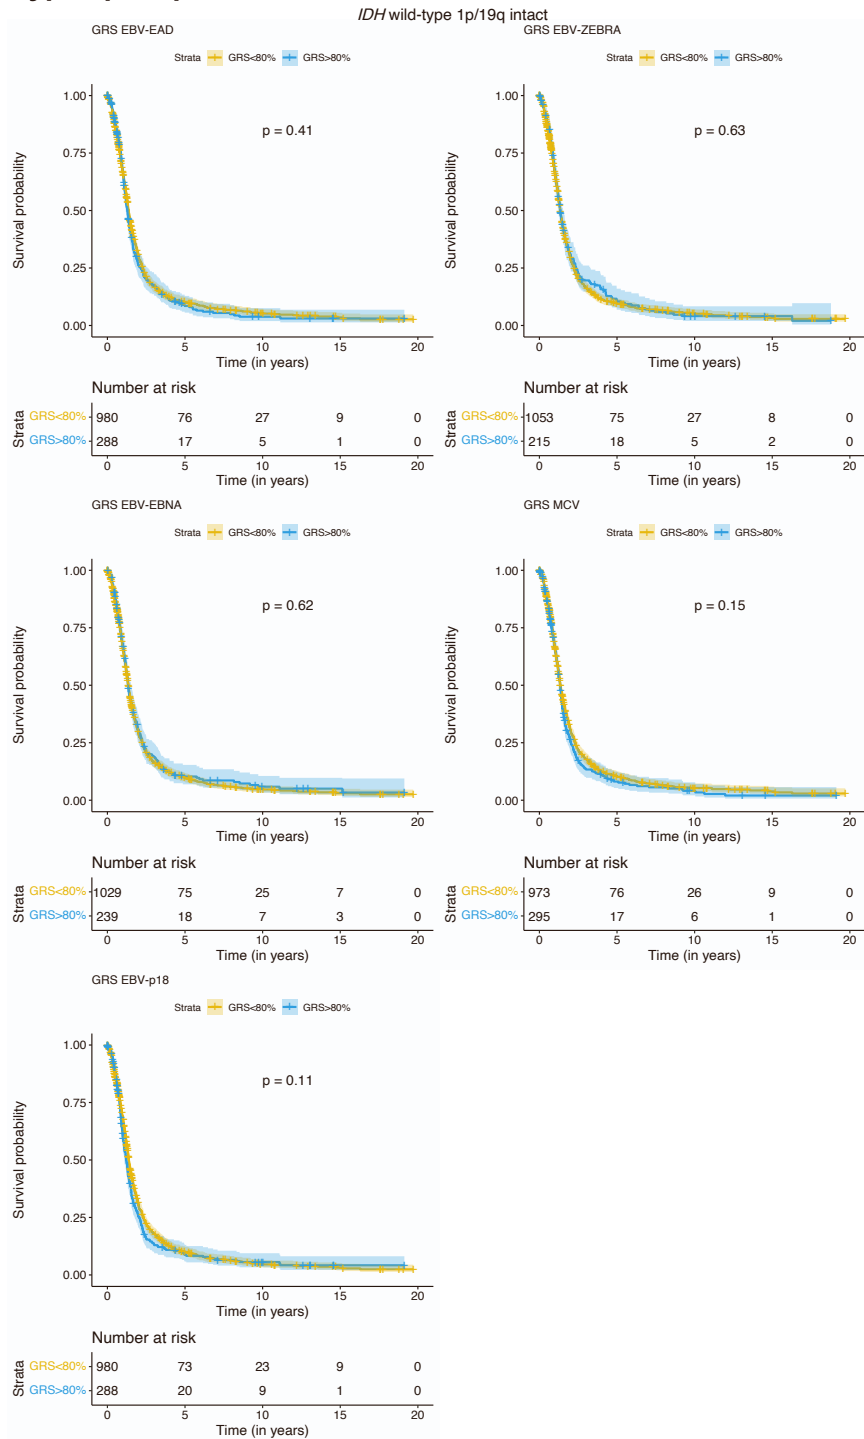

A-F) Kaplan-Meier curves for GRS associations with the survival in the specified molecular glioma subtype. Each plot represents a visualization of the association of a specific viral antigen GRS with clinical outcomes in the molecular subtype. To visualize, each antigen's unnormalized GRS scores across the included studies were binned based on the case-specific 80<sup>th</sup> percentile score in the UCSF-Mayo dataset. P-values included on each plot are results of a log-rank test for difference between the two curves. Below each set of curves provides the number of cases surviving beyond that time point, for each of the two GRS groups.

## Supplemental Tables

**Table S1: GWAS glioma risk meta results by subtype for the GRS variants**  
**Separate excel file.** All antigen-associated SNPs considered, basic variant information and beta/SE/p-value for a meta-GWAS for the association of the SNPs for each glioma subtype.

**Table S2: SNP2HLA HLA variant glioma risk results by subtype**  
**Separate excel file.** All HLA alleles/genes which were imputed via SNP2HLA, beta/SE/p-value for associations in a meta-analysis of risk analysis of each of the HLA alleles on each glioma subtype.

**Table S3: Summary of GRS-glioma risk significant results\***

| Subtype              | Antigen GRS | Meta OR (95% CI)     | Meta P-value |
|----------------------|-------------|----------------------|--------------|
| Glioma               | EBV ZEBRA   | 0.936 [0.888, 0.985] | 0.0116       |
| <i>IDH</i> mutated   | EBV EBNA    | 1.086 [1.004, 1.175] | 0.0402       |
| 1p/19q codeleted     | EBV EBNA    | 1.138 [1.012, 1.280] | 0.0308       |
| <i>IDH</i> wild type | EBV ZEBRA   | 0.910 [0.850, 0.975] | 0.0072       |
|                      | MCV         | 1.089 [1.018, 1.165] | 0.0131       |
| 1p/19q non-codeleted | EBV ZEBRA   | 0.908 [0.844, 0.977] | 0.0099       |
|                      | MCV         | 1.11 [1.031, 1.194]  | 0.0054       |

\*These results mirror those of Figure 3 in the main text  
*Indentation indicates subtype is further subset of the above result*

**Table S4: Summary of GRS-glioma survival significant results\***

| Subtype              | Antigen GRS | Meta HR (95% CI)     | Meta P-value |
|----------------------|-------------|----------------------|--------------|
| <i>IDH</i> mutated   | EBV EBNA    | 0.857 [0.762, 0.964] | 0.010        |
| 1p/19q codeleted     | EBV EBNA    | 0.754 [0.569, 0.998] | 0.048        |
|                      | EBV ZEBRA   | 1.268 [1.009, 1.592] | 0.042        |
| 1p/19q non-codeleted | EBV EBNA    | 0.860 [0.741, 0.997] | 0.045        |

\*These results mirror those of Figure 4 in the main text  
*Indentation indicates subtype is further subset of the above result*

**Table S5: Number of SNPs used in each antigen GRS**

|              | EBV-<br>ZEBRA | EBV-<br>p18 | EBV-<br>EBNA | MCV | EBV-<br>EAD | HHV7 | BKV | HSV1 | JCV | VZV | CMV | HHV6 |
|--------------|---------------|-------------|--------------|-----|-------------|------|-----|------|-----|-----|-----|------|
| <b>#SNPs</b> | 11            | 9           | 7            | 6   | 5           | 3    | 1   | 1    | 1   | 1   | 1   | 1    |

Antigens with >4 SNPs were further used in polygenic analyses

**Table S6: Effect of genetic ancestry on significant glioma risk results**

| Subtype                               | Antigen GRS/<br>HLA Allele | Including 10 PCs     | Including 15 PCs     | Including 20 PCs     |
|---------------------------------------|----------------------------|----------------------|----------------------|----------------------|
|                                       |                            | Meta OR (95% CI)     | Meta OR (95% CI)     | Meta OR (95% CI)     |
| Glioma overall                        | EBV ZEBRA                  | 0.936 [0.888, 0.985] | 0.930 [0.883, 0.981] | 0.939 [0.891, 0.991] |
|                                       | HLA DQA1*03:01             | 0.845 [0.769, 0.927] | 0.887 [0.801, 0.982] | 0.896 [0.808, 0.993] |
| <i>IDH</i> mut                        | EBV EBNA                   | 1.086 [1.004, 1.175] | 1.091 [1.005, 1.185] | 1.098 [1.010, 1.194] |
| <i>IDH</i> mut<br>1p/19q codel        | EBV EBNA                   | 1.138 [1.012, 1.280] | 1.144 [1.009, 1.296] | 1.158 [1.019, 1.316] |
| <i>IDH</i> WT                         | EBV ZEBRA                  | 0.910 [0.850, 0.975] | 0.905 [0.844, 0.970] | 0.910 [0.848, 0.977] |
|                                       | MCV                        | 1.089 [1.018, 1.165] | 1.086 [1.015, 1.162] | 1.083 [1.012, 1.159] |
|                                       | HLA DQA1*03:01             | 0.817 [0.721, 0.925] | 0.850 [0.733, 0.986] | 0.891 [0.766, 1.037] |
| <i>IDH</i> WT<br>1p/19q non-<br>codel | EBV ZEBRA                  | 0.908 [0.844, 0.977] | 0.950 [0.858, 1.051] | 0.906 [0.840, 0.977] |
|                                       | MCV                        | 1.11 [1.031, 1.194]  | 1.045 [0.946, 1.155] | 1.101 [1.022, 1.185] |

Glioma risk meta-analyses were conducted including 10, 15, or 20 genetic principal components to control for fine-scale population substructure.
